# Supplementary material for: An Insulator Element Located at the Cyclin B1 Interacting Protein 1 Gene Locus Is Highly Conserved among Mammalian Species
Source: PLoS One. 2015 Jun 25;10(6):e0131204. doi: 10.1371/journal.pone.0131204 (PMC4481373; doi:10.1371/journal.pone.0131204)
Supplement: S1 Table — (XLSX) [file pone.0131204.s010.xlsx]

## Sheet: S1_Table
S1_Table. Primers for bisulfite sequencing analysis.
Target	Forward	Reverse
Region 1	TGAGTTTTAGGTTTGTGAAGAAGTG	CCTTTTTAAATCAAAATTACCTCACTTAA
Region 2	TTTTTAGGGTTTGTTAAATTATTTATTT	CAAAAACTACACTCACCCTCC
Region 3	TTTAAAGGATGAAAGGTAAATGATTTAG	AAAAAAACTCTATTCCCAACTTCCTA
Region 3	TTTTTAATTTTAAAATGTGTTGTTAGATTG	TCTTAAAAAATAAACATTAAACCACCC
Region 3	TGGATTAAATTAGGTATTTTATTTGTTTGT	AAAACCCATTACTTAAATAACTTCCC
Region 3	TTTAATAGAGAATTAAAGATAGAGGTTGTA	AAAAAAAACAAACAAATAAAATACCTAATT
Region 4	TTATTTTTTATAAAGGAAGTTTAGAATGGTTTA	AATTTAACAAACCCTAAAAAAACTAAC
Region 4	TTAGTATTAAGGAGAAAAATAGGAGTTTTGT	CCATTCTAAACTTCCTTTATAAAAAATAAAC
Region 4	AATTAATTAAGTAGGATTGTAGAGATGGATT	AAAACTCACAAAACTCCTATTTTTCTC
Region 5	GGAAGATGTGGGGAGTATATTTATTT	CAAAAAAACCTACATTCTATTCTCAAC
Region 5	TGTTTGTTTTTTTTGAGGTTTTAAGTT	AATAAATATACTCCCCACATCTTCCT
Region 5	TTTGGGGTTTTTATAGGGTTTTTAT	AATTACCTTAACAATCTCTAAACCTTACTT
Region 6	TTAGTTAAGTTAGTGGAGATTTGAAATGTA	AACCAACCTACCTAAAAAAAACAAC
Region 7	TAAGGTTTGATGGGTAGTAGGAGG	TACTCCCAATCCTAAAACATCCA
Region 7	TTTTTTAGTTTAAGTGAAGGTGTAGATTTT	CCTCCTACTACCCATCAAACCTTA
