# Supplementary material for: An Insulator Element Located at the Cyclin B1 Interacting Protein 1 Gene Locus Is Highly Conserved among Mammalian Species
Source: PLoS One. 2015 Jun 25;10(6):e0131204. doi: 10.1371/journal.pone.0131204 (PMC4481373; doi:10.1371/journal.pone.0131204)
Supplement: S2 Table — (XLSX) [file pone.0131204.s011.xlsx]

## Sheet: S2 Table
S2 Table. Primers for vector construction for reporter assays
Target	Forward	Reverse	Purpose
JF1 inserted DNA (+1 to +1799)	ATTGGCCGCCGAGGCCACCAAAGACAGAGGCTGCAC	ATTGGCCTAACTGGCCGGATCAATCCACCTCCCTTT	Cloning in sense orientation
JF1 inserted DNA (+1 to +1799)	ATTGGCCTAACTGGCCACCAAAGACAGAGGCTGCAC	ATTGGCCGCCGAGGCCGGATCAATCCACCTCCCTTT	Cloning in antisense orientation
JF1 inserted DNA (+886 to +1349)	ATTGGCCGCCGAGGCCCAAGGACGGGAAGCTACCTA	ATTGGCCTAACTGGCCGCCCTGAAGGCAATTTCTAA	Cloning in sense orientation
JF1 inserted DNA (+886 to +1349)	ATTGGCCTAACTGGCCCAAGGACGGGAAGCTACCTA	ATTGGCCGCCGAGGCCGCCCTGAAGGCAATTTCTAA	Cloning in antisense orientation
JF1 inserted DNA (+1128 to +1312)	ATTGGCCGCCGAGGCCCCTGATTGGCTGAGTTCAAGA	ATTGGCCTAACTGGCCGCAGTCTGGCAGCACATTT	Cloning in sense orientation
JF1 inserted DNA (+1128 to +1312)	ATTGGCCTAACTGGCCCCTGATTGGCTGAGTTCAAGA	ATTGGCCGCCGAGGCCGCAGTCTGGCAGCACATTT	Cloning in antisense orientation
JF1 inserted DNA (+886 to +1146)	ATTGGCCGCCGAGGCCAAATGTGCTGCCAGACTGC	ATTGGCCTAACTGGCCGCCCTGAAGGCAATTTCTAA	Cloning in sense orientation
JF1 inserted DNA (+886 to +1146)	ATTGGCCTAACTGGCCAAATGTGCTGCCAGACTGC	ATTGGCCGCCGAGGCCGCCCTGAAGGCAATTTCTAA	Cloning in antisense orientation
SV40 enhancer	ATTGGCCTAACTGGCCCGATGGAGCGGAGAATGG	ATTGGCCGCCGAGGCCGCTGTGGAATGTGTGTCAGTTAG
SV40 enhancer	CTTAAAATGAGCGTTGAGTTCGATGGAGCGGAGAATGG	ATTGGCCGCCGAGGCCGCTGTGGAATGTGTGTCAGTTAG	Connected by overlap PCR (Insulator on 5' side and enhancer on 3' side)
Ccnb1ip1 insulator	ATTGGCCTAACTGGCCGCCCTGAAGGCAATTTCT	GCCCATTCTCCGCTCCATCGAACTCAACGCTCATTTTAAGATTG
SV40 enhancer	ATTGGCCTAACTGGCCCGATGGAGCGGAGAATGG	TTAGAAATTGCCTTCAGGGCGCTGTGGAATGTGTGTCAGTTAG	Connected by overlap PCR (Insulator on 3' side and enhancer on 5' side)
Ccnb1ip1 insulator	ACTGACACACATTCCACAGCGCCCTGAAGGCAATTTCT	ATTGGCCGCCGAGGCCAACTCAACGCTCATTTTAAGATTG
SV40 enhancer	GGGATACGGGGAAAAAGCTTCGATGGAGCGGAGAATGG	ATTGGCCGCCGAGGCCGCTGTGGAATGTGTGTCAGTTAG	Connected by overlap PCR (Insulator on 5' side and enhancer on 3' side)
cHS4 insulator	ATTGGCCTAACTGGCCGAGCTCACGGGGACAGC	GCCCATTCTCCGCTCCATCGAAGCTTTTTCCCCGTATCC
SV40 enhancer	ATTGGCCTAACTGGCCCGATGGAGCGGAGAATGG	GGGGCTGTCCCCGTGAGCTCGCTGTGGAATGTGTGTCAGTTAG	Connected by overlap PCR (Insulator on 3' side and enhancer on 5' side)
cHS4 insulator	ACTGACACACATTCCACAGCGAGCTCACGGGGACAGC	ATTGGCCGCCGAGGCCAAGCTTTTTCCCCGTATCC
Human homologous sequence (+1 to +1878)	ATTGGCCGCCGAGGCCGTTCACCAAGAAAGCCGAAA	ATTGGCCTAACTGGCCGCAGGGTGGATAGGATGAAA	Cloning in sense orientation
Human homologous sequence (+1 to +1878)	ATTGGCCTAACTGGCCGTTCACCAAGAAAGCCGAAA	ATTGGCCGCCGAGGCCGCAGGGTGGATAGGATGAAA	Cloning in antisense orientation
Human homologous sequence (+1 to +975)	ATTGGCCGCCGAGGCCGTTCACCAAGAAAGCCGAAA	ATTGGCCTAACTGGCCTTTTATCAGGCCAGCTTTGG	Cloning in sense orientation
Human homologous sequence (+1 to +1878)	ATTGGCCTAACTGGCCGTTCACCAAGAAAGCCGAAA	ATTGGCCGCCGAGGCCTTTTATCAGGCCAGCTTTGG	Cloning in antisense orientation
Human homologous sequence (+672 to +1878)	ATTGGCCGCCGAGGCCTGGACCAGTGATGCTTCTTG	ATTGGCCTAACTGGCCGCAGGGTGGATAGGATGAAA	Cloning in sense orientation
Human homologous sequence (+672 to +1878)	ATTGGCCTAACTGGCCTGGACCAGTGATGCTTCTTG	ATTGGCCGCCGAGGCCGCAGGGTGGATAGGATGAAA	Cloning in antisense orientation
